## Endovascular thrombectomy and perioperative stroke

1  
2  
3  
4  
5  
6  
7  
8  
9  
10  
11  
12  
13  
14  
15  
16  
17  
18  
19  
20  
21  
22  
23  
24  
25

### **Endovascular thrombectomy: an effective and safe therapy for perioperative ischemic stroke**

Feng Wang<sup>1,\*</sup>, Xiaoping Xu<sup>1,\*</sup>, Ling Zheng<sup>1</sup>, Jiawei Zhong<sup>1</sup>, En Wang<sup>1</sup>, Yang Liu<sup>1,2,#</sup>, and  
Shaofa Ke<sup>1,#</sup>

<sup>1</sup> Department of Neurology, Taizhou Hospital of Zhejiang Province, Affiliated to Wenzhou  
Medical University, Linhai, Zhejiang, China

<sup>5</sup>Department of Neurology, Saarland University, Homburg, Germany

\*: These two authors equally contribute to this study

#: These two authors share the senior authorship.

**Running title:** Endovascular thrombectomy and perioperative stroke

Correspondence should be addressed to:

Dr. Yang Liu, Department of Neurology, Saarland University, 66421 Homburg, Germany. Tel:

+49-6841-1624260; Fax: +49-6841-1624175; E-mail: [a.liu@mx.uni-saarland.de](mailto:a.liu@mx.uni-saarland.de); ORCID:

0000-0002-7614-4233

or

Dr. Shaofa Ke, Department of Neurosurgery, Taizhou Hospital of Zhejiang Province affiliated

to Wenzhou Medical University, 317000 Linhai, Zhejiang province, China. Tel: +86-576-

85133031; E-mail: [kesf@enzemed.com](mailto:kesf@enzemed.com)

**Total word count of the manuscript: 6134**

NOTE: This preprint reports new research that has not been certified by peer review and should not be used to guide clinical practice.

## Endovascular thrombectomy and perioperative stroke

### 1 **Abstract**

2 **Background:** Perioperative ischemic stroke is a rare but devastating complication.

3 Mechanical thrombectomy is a promising therapeutic method, but very little data is available  
4 on its efficacy and safety. This study aims to answer this question by comparing the clinical  
5 outcomes of perioperative and community-onset stroke patients after endovascular therapy.

6 **Methods:** A retrospective cohort study was conducted on a total of 35 perioperative and 584  
7 community-onset acute ischemic stroke patients who underwent endovascular thrombectomy  
8 at our hospital over the past 3.5 years. The recanalization rate, clinical recovery and cerebral  
9 hemorrhage within 90 days after therapy were compared between these two patient groups.

10 **Results:** Endovascular thrombectomy provided perioperative and community-onset ischemic  
11 stroke patients with comparable rates of successful reperfusion (mTICI  $\geq$  2b grade) (97.1%  
12 vs. 97.3%;  $P = 0.967$ ) and favorable functional recovery (mRS  $\leq$  2) (51.4% vs. 43.3%,  $P =$   
13 0.348), with no increase in severe intracranial hemorrhage (0% vs. 2.6% and 1.0%, for  
14 hematoma  $\geq$  30% of infarcted tissue and intraventricular hemorrhage, respectively) within 90  
15 days. In addition, perioperative stroke patients had higher prevalence of atrial fibrillation  
16 (42.9 % vs. 26.7 %;  $P = 0.038$ ) and intracranial cerebral artery stenosis without clear  
17 embolism (17.1 % vs. 3.8 %;  $P < 0.001$ ) than community-onset stroke patients.

18 **Conclusions:** Endovascular thrombectomy is an effective and safe therapeutic approach for  
19 patients with perioperative ischemic stroke, although the results need to be validated by  
20 further studies with larger populations. Atrial fibrillation and large artery stenosis may  
21 contribute to the pathogenesis of perioperative ischemic stroke.

22

23 **Keywords:** Perioperative stroke, community-onset stroke, endovascular thrombectomy,  
24 intracranial hemorrhage, prognosis

25

## Endovascular thrombectomy and perioperative stroke

### 1 **Introduction**

2 Perioperative stroke is defined as any embolic, thrombotic or hemorrhagic  
3 cerebrovascular incident within 30 days of an operation <sup>1</sup>. Similar to community-onset stroke,  
4 the majority of perioperative strokes are ischemic rather than hemorrhagic <sup>2</sup>. The incidence of  
5 perioperative stroke ranges from approximately 0.075% to 1.9% in non-cardiac/major  
6 vascular/neurological operations <sup>2-5</sup> to almost 10% in individuals undergoing high-risk  
7 cardiovascular surgery <sup>6</sup>. In patients undergoing cardiac surgery, emboli are frequently  
8 identified as a primary cause of perioperative stroke <sup>1 3</sup>. In patients undergoing non-  
9 cardiac/vascular surgery, the cause of stroke is less clear. Suspected mechanisms of  
10 perioperative stroke include cerebral hypotension/low-flow states and previously undetected  
11 large-artery stenosis <sup>1</sup>. It is known that intracranial atherosclerotic stenosis is more common  
12 in the Asian people than in the Western population <sup>7</sup>. The mechanism of large artery stenosis  
13 in perioperative stroke should be given special attention in Chinese hospitals.

14 Perioperative stroke is a devastating complication for both patients and the treating  
15 surgeons/anesthesiologists <sup>3 6</sup>. The 30-day mortality rate for patients who suffer a  
16 perioperative stroke after non-cardiac/major-vascular/neurologic surgery is up to 8 times  
17 higher than for stroke patients unrelated to surgery <sup>3</sup>. The length of hospitalization and the  
18 likelihood of discharge to a long-term care facility are also increased in patients with a  
19 perioperative stroke. An efficient therapy is urgently needed.

20 Intravenous thrombolysis is usually avoided in cases of perioperative stroke due to  
21 surgery itself being a contraindication for thrombolysis, leading to an elevated risk of  
22 bleeding <sup>2</sup>. Mechanical endovascular thrombectomy (EVT) has become a standard treatment  
23 for stroke caused by large vessel occlusion <sup>8</sup>, and also emerged as a novel therapeutic  
24 approach for perioperative stroke. Its use has been increasing over the past 15 years <sup>9</sup>. A  
25 retrospective study showed that EVT can achieve comparable success in cerebral reperfusion

## Endovascular thrombectomy and perioperative stroke

1 in patients with perioperative stroke and stroke unrelated to surgery, although mortality  
2 within 3 months after EVT is higher in the former than in the latter (33.3% vs. 4.2%)<sup>10</sup>.  
3 However, in a retrospective study comparing patients with in-hospital and community-onset  
4 stroke, EVT resulted in a lower recanalization rate and poorer recovery in in-hospital stroke  
5 patients<sup>11</sup>. We remain optimistic about EVT therapy in perioperative stroke as surgical  
6 procedures continue to evolve and minimally invasive procedures in particular is becoming  
7 more common, which means that the pathophysiology of current perioperative stroke patients  
8 may be different from that in the past. Further research is needed to evaluate the benefits and  
9 safety of EVT in perioperative stroke.

10 In our research, we conducted a retrospective analysis of all 697 patients with acute  
11 ischemic stroke (AIS) who underwent EVT at our hospital over the past 3.5 years, and  
12 compared cerebral reperfusion post therapy, clinical recovery within 3 months, and incidence  
13 of cerebral bleeding between patients with perioperative and community-onset stroke. We  
14 found that EVT was an effective and safe therapeutic approach for perioperative stroke.

15

## 16 **Methods**

### 17 **Study Design**

18 Our project was a retrospective cohort study. The study protocol was approved by the  
19 Ethics Committee of Taizhou Hospital, Zhejiang Province, China (Registration number:  
20 K20181204). Written consent was waived due to the retrospective design. Between January  
21 2020 and June 2023, total 697 patients aged  $\geq 18$  years suffering from AIS (including 35  
22 patients with perioperative stroke) at our hospital received EVT according to the international  
23 and Chinese guidelines<sup>12 13</sup>. Perioperative stroke was defined as AIS occurring during or  
24 within 30 days following the operative procedure<sup>6</sup>. Inclusion criteria were as follows: Age  
25  $\geq 18$  years; diagnosis of acute ischemic stroke with proven arterial occlusion confirmed by

## Endovascular thrombectomy and perioperative stroke

1 computed tomography (CT) or magnetic resonance imaging (MRI); at least one attempt of  
2 EVT; EVT performed within 24 hours of symptom onset. Exclusion criteria was the presence  
3 of severe medical conditions, such as advanced heart failure, end-stage kidney disease, or  
4 terminal illness, which needed more urgent management.

### 5 **EVT and post-operative management**

6 Endovascular therapy included stent retriever, aspiration catheter, balloon angioplasty  
7 and combination of different techniques. Balloon angioplasty was performed as the  
8 therapeutic method of first choice for recanalization in AIS patients who exhibited the "first-  
9 pass effect" of the microcatheter, in which blood was already flowing through the occluded  
10 vessel when the microcatheter was first passed and then withdrawn to the proximal side of  
11 the occluded vessel during EVT <sup>14</sup>. The number of passes of catheter needed to achieve  
12 recanalization or until the end of procedure and the location of endovascular therapy were  
13 documented. At the end of EVT, the interventional neurologist determined a modified  
14 Thrombolysis in Cerebral Infarction (mTICI) score <sup>15</sup>. Twenty-four hours after EVT or at any  
15 time within 24 hours when neurologic deficits progressed, patients were reexamined by head  
16 CT and scored using the National Institute of Health Stroke Scale (NIHSS). In the absence of  
17 hemorrhagic side effects, regular treatment consisted of antiplatelet agents and anticoagulants  
18 started 24 hours after EVT. Other treatment strategies included the therapy for causative  
19 surgeries in perioperative AIS patients, and statins, blood glucose and blood pressure control  
20 or combinations of these treatments according to the Chinese guidelines for the early  
21 treatment of AIS patients <sup>13</sup>.

### 22 **Data Collection**

23 The aim of this study was to compare the efficacy and safety of EVT in patients with  
24 perioperative and community-onset ischemic stroke. The primary efficacy outcome was the  
25 recovery of functional outcome as shown in the modified Rankin Scale (mRS) at 90 days

## Endovascular thrombectomy and perioperative stroke

1 after EVT. Good functional outcome was defined as mRS score  $\leq 2$ . The secondary efficacy  
2 outcome was the attenuation of neurological deficits as assessed by NIHSS scores at 24  
3 hours, and 7 days after EVT (or at the hospital discharge). The third efficacy outcome was  
4 recanalization of the occluded cerebral artery. Successful reperfusion was defined as mTICI  
5 score of 2b, 2c or 3 and unsuccessful revascularization as mTICI score of 0, 1 or 2a after  
6 EVT<sup>15</sup>.

7 The primary safety outcome was intracranial hemorrhage as reflected by CT scanning  
8 or MRI, which were typically conducted within 7 days after EVT, with the timing determined  
9 by the individual patient's situation and the examination capacity of our neuroradiology  
10 department. Upon neurological deterioration, a head CT was immediately performed. The  
11 Heidelberg Bleeding Classification was used to categorize the hemorrhage<sup>16</sup>. The second  
12 safety outcome was all-cause mortality within 90 days after EVT.

13 Baseline demographic, clinical information, and laboratory findings within 24 hours  
14 after EVT were collected for all enrolled patients. Stroke subtypes were classified according  
15 to the Trial of ORG 10172 in the Acute Stroke Treatment classification (TOAST)<sup>17</sup>. The  
16 Alberta stroke program early CT score (ASPECTS) was performed for both anterior and  
17 posterior circulations on the CT scan at admission<sup>18 19</sup>.

### 18 **Statistical analysis**

19 The statistical analysis was conducted using SPSS software for Windows (Version  
20 26.0, IBM, Armonk, USA). The data for continuous variables were described as mean  $\pm$  SD,  
21 and categorical variables were presented as frequencies. Continuous variables were compared  
22 between independent groups by *T*-test or Mann-Whitney *U* test depending on whether the  
23 continuous variables were normally distributed. Categorical variables were compared by  
24 Pearson  $\chi^2$  test. The association between the reduction of NIHSS score 24 hours after EVT  
25 compared with the score before EVT, and various clinical and laboratory parameters was first

## Endovascular thrombectomy and perioperative stroke

1 investigated by Pearson correlation test and then linear regression analysis using  
2 bootstrapping.  $P < 0.05$  was considered statistically significant.

3

### 4 **Results**

#### 5 **Patient data**

6 From January 2020 to June 2023, 35 perioperative AIS patients and 662 community-  
7 onset AIS patients underwent EVT in our hospital according to the international and Chinese  
8 guidelines<sup>12 13</sup>. The causative surgeries of 35 perioperative stroke patients are listed in  
9 Supplementary Table 1, of whom 28 (80.0%) developed ischemic stroke minimally 1 day (1 -  
10 28 days with a median duration of 2 days) after surgery and 10 (28.6%) had undergone  
11 cardiovascular surgery. After discharge from hospital, all AIS patients were followed up for  
12 more than 3 months by face-to-face examination or by telephone. Of community-onset AIS  
13 patients, 47 patients underwent EVT 24 hours after symptom onset due to the presence of a  
14 penumbra on CT or MRI imaging; and 31 AIS patients dropped out during the 90-day follow-  
15 up period. These 78 patients were not included in this study. Finally, 35 perioperative and 584  
16 community-onset AIS patients were analyzed in this study (see Supplemental Figure S1,  
17 flowchart).

18 The demographic and baseline characteristics of perioperative and community-onset  
19 AIS patients were shown in Table 1. The atrial fibrillation was more frequent in perioperative  
20 group than in community-onset group (42.9% vs. 26.7%;  $\chi^2(1) = 4.305$ ,  $P = 0.038$ ).  
21 However, both the systolic and diastolic blood pressures were lower in perioperative than in  
22 community-onset stroke patients ( $P < 0.001$ ). The number of monocytes, concentrations of C-  
23 reactive protein and fibrinogen in the blood were higher in perioperative than in community-  
24 onset AIS patients ( $P < 0.05$ ). Due to the causative surgeries, significantly more perioperative  
25 AIS patients than community-onset patients received anticoagulant or together with

## Endovascular thrombectomy and perioperative stroke

1 antiplatelet therapy after EVT ( $\chi^2 (3) = 54.721, P < 0.001$ ). All other analyzed parameters,  
2 including age, sex, pre-stroke risk factors (e.g., hypertension, diabetes mellitus, coronary  
3 heart disease, previous stroke and current smoking), laboratory findings 24 hours after EVT  
4 (e.g., platelets, D-dimer, glucose, creatinine, cholesterol, et al.), and TOAST classification  
5 were not different between these two groups. Of note, there were no significant differences  
6 between the perioperative and community-onset groups in the neurological severity of stroke  
7 patients as shown by NIHSS scores before EVT (median value  $17.4 \pm 10.1$  vs.  $15.9 \pm 7.6$ ;  
8 Mann-Whitney-U-Test,  $Z = -0.553, P = 0.580$ ). Thus, these 2 comparable groups of AIS  
9 patients were suitable for analysis of the efficacy and safety of EVT treatments in  
10 perioperative stroke.

11

12 **EVT provided perioperative AIS patients with a comparable reperfusion rate and 3-**  
13 **month rehabilitation, and even a faster recovery within 24 hours compared to**  
14 **community-onset AIS patients**

15 There was no significant difference in the rate of successful reperfusion [mTICI  $\geq$  2b  
16 grade]) between perioperative and community-onset AIS patients (Table 2; 97.1% vs. 97.3%;  
17  $\chi^2 (1) = 0.002, P = 0.967$ ). Similarly, the distribution of mTICI scores (1 = mTICI 0, 1 or 2a,  
18 2 = mTICI 2b, and 3 = mTICI 3), which categorize the level of successful reperfusion, did  
19 not show any significant differences between these two AIS patient groups (Supplementary  
20 Fig. S2;  $\chi^2 (2) = 0.035, P = 0.983$ ). It was also found that the causative surgeries did not  
21 complicate the EVT procedure, as the number of catheter passes required for recanalization  
22 did not vary significantly between these two groups of patients (Table 2;  $1.6 \pm 0.9$  vs.  $1.4 \pm$   
23  $0.8$ ; Mann-Whitney-U-Test,  $Z = -1.436, P = 0.151$ ). In addition, perioperative and  
24 community-onset AIS patients did not differ in operative time of EVT and the site of arterial  
25 occlusion (Table 2).



## Endovascular thrombectomy and perioperative stroke

1           It should be noted that there were more patients in the perioperative stroke group than  
2 in the community-onset stroke group (Table 2; 17.1% vs. 3.8%;  $\chi^2(1) = 13.680$ ,  $P < 0.001$ ),  
3 who had the "first-pass effect" of the microcatheter, which suggests severe stenosis in the  
4 intracranial cerebral arteries and not severe embolism-related vascular occlusion<sup>20</sup>, and  
5 whose cerebral blood flow could be sufficiently improved by balloon angioplasty alone.

6           Possibly due to the professional medical care in the hospital, patients with  
7 perioperative stroke were much easier to recognize than patients with community-onset  
8 stroke. As shown in Table 2, the time from onset of symptoms to puncture was significantly  
9 shorter ( $202.5 \pm 217.3$  vs.  $448.6 \pm 279.7$  minutes; Mann-Whitney-U-Test,  $Z = -6.553$ ,  $P <$   
10  $0.001$ ), and the ASPECT score was significantly higher ( $9.9 \pm 0.7$  vs.  $8.5 \pm 1.8$ ; Mann-  
11 Whitney-U-Test,  $Z = -5.454$ ,  $P < 0.001$ ) in perioperative AIS patients than in the community-  
12 onset AIS controls. The improvement in neurological deficits shown by the reduction in  
13 NIHSS score 24 hours after EVT compared with NIHSS score before EVT was significantly  
14 more pronounced in perioperative stroke patients than in community-onset stroke patients  
15 (Table 2;  $\Delta$ NIHSS score:  $5.5 \pm 8.9$  vs.  $1.56 \pm 6.0$ ; Mann-Whitney-U-Test,  $Z = -3.052$ ,  $P =$   
16  $0.002$ ). Unfortunately, this favorable recovery after EVT was lost in perioperative AIS  
17 patients compared to community-onset AIS patients in the following 7 days, as the NIHSS  
18 scores did not differ between perioperative and community-onset AIS patients 7 days after  
19 EVT (Table 2;  $9.4 \pm 9.4$  vs.  $11.0 \pm 12.0$ ; Mann-Whitney-U-Test,  $Z = -1.271$ ,  $P = 0.204$ ).

20           To investigate the underlying mechanisms hindering further recovery of perioperative  
21 AIS patients, we combined perioperative and community-onset AIS patients and performed a  
22 correlation analysis to identify variables related to NIHSS score reduction within 24 hours  
23 after EVT (see Supplementary Table 2). We then performed a regression analysis with NIHSS  
24 reduction as the dependent variable and the correlated parameters as independent variables.  
25 We found that perioperative stroke classification, smoking and NIHSS score at admission

## Endovascular thrombectomy and perioperative stroke

1 positively predicted, while diabetes, white blood cell count, D-dimer, creatine, systolic blood  
2 pressure, puncture-to-recanalization time and location of occluded artery with MCA as the  
3 reference location negatively predicted NIHSS score reduction (Supplementary Table 3). In  
4 combination with the high levels of monocytes and C-reactive protein in perioperative AIS  
5 patients compared to community-onset stroke patients (Table 1), inflammatory activation  
6 could be an influential factor affecting clinical recovery.

7 To assess the functional recovery of all AIS patients under study, mRS scores were  
8 evaluated 90 days after EVT. The analysis revealed no significant differences in the  
9 distribution of mRS scores between patients with perioperative and community-onset AIS  
10 (Figure 1;  $\chi^2(6) = 5.923, P = 0.432$ ). The percentage of patients achieving a favorable  
11 outcome ( $mRS \leq 2$ ) in perioperative group was comparable with that in community-onset  
12 AIS group (Table 2; 51.4% vs. 43.3%,  $\chi^2(1) = 0.882, P = 0.348$ ). The mortalities during the  
13 entire course of the study were also not significantly different between perioperative and  
14 community-onset AIS patients (Table 2; 11.4% vs. 17.8%,  $\chi^2(1) = 0.933, P = 0.334$ ).

15

### 16 **EVT did not increase a hemorrhagic risk for perioperative AIS patients compared with** 17 **community-onset AIS patients**

18 Hemorrhagic transformation is the most important adverse event after EVT therapy in  
19 AIS patients. The percentage of patients diagnosed with overall intracranial hemorrhage  
20 within 7 days after EVT was comparable in the perioperative and community-onset AIS  
21 groups (Table 3; 25.7% vs. 19.5%;  $\chi^2(1) = 0.796, P = 0.372$ ). After dividing the AIS patients  
22 into subgroups according to the Heidelberg Bleeding Classification<sup>16</sup>, we found that  
23 perioperative and community-onset AIS patients differed significantly in terms of intracranial  
24 hemorrhage (Table 3;  $\chi^2(5) = 16.299, P = 0.004$ ). However, the difference was limited in the  
25 subgroups of HI1 (11.4% vs. 3.8%;  $\chi^2(1) = 4.817, P = 0.028$ ) and PH1-type (8.6% vs. 2.4%;

## Endovascular thrombectomy and perioperative stroke

1  $\chi^2$  (1) = 4.713,  $P = 0.030$ ) hemorrhages, and subarachnoid hemorrhage (5.7% vs. 0.9%;  $\chi^2$   
2 (1) = 6.970,  $P = 0.008$ ) (Table 3). There were no perioperative AIS patients in the subgroups  
3 of PH2 and intraventricular hemorrhage, perhaps due to the limited sample size (Table 3).

4

## 5 **Discussion**

6 Intravenous thrombolysis is often not feasible in perioperative AIS patients as it  
7 increases the risk of bleeding<sup>26</sup>. EVT is the most useful method for recanalization of cerebral  
8 arteries in perioperative AIS patients and is increasingly practiced in many hospitals<sup>9</sup>.  
9 However, the efficacy of EVT in improving patient outcomes remains uncertain. Our study  
10 showed that EVT in perioperative AIS patients resulted in a similar reperfusion rate and 3-  
11 month recovery without an increased risk of bleeding and death compared to patients with  
12 community-onset stroke.

13 In our study, we used the entire cohort of community-onset stroke patients instead of  
14 selecting certain matched AIS patients as a control group for perioperative AIS patients,  
15 which we believe can limit the sampling bias and better represent the real-world information.  
16 The NIHSS score is higher in perioperative AIS patients than in community-onset AIS  
17 patients, even though there is no statistical difference, which demonstrates the efficacy of  
18 EVT in perioperative stroke. We found that atrial fibrillation was significantly more common  
19 in perioperative AIS patients than in community-onset AIS patients, which is consistent with  
20 previous studies that perioperative or postoperative atrial fibrillation was associated with an  
21 increased risk of both early and long-term ischemic stroke, especially in patients undergoing  
22 non-cardiac surgery<sup>21 22</sup>. Our study seems to show that undetected stenosis of the intracranial  
23 arteries is a pathogenic mechanism of perioperative stroke. We observed more AIS patients in  
24 the perioperative stroke group than in the community-onset stroke group (17.1 % vs. 3.8 %)  
25 who had atherosclerotic stenosis in the cerebral arteries without clear thrombi or emboli, in

## Endovascular thrombectomy and perioperative stroke

1 whom balloon angioplasty alone was able to restore blood flow to the brain tissue.  
2 Intracranial atherosclerotic stenoses pose a challenge for EVT in AIS patients as they increase  
3 intraprocedural re-occlusion<sup>23</sup>. A recent study in AIS patients with intracranial  
4 atherosclerosis-related large vessel occlusion showed that balloon angioplasty as a first-  
5 choice recanalization strategy has a higher efficiency in recanalization and better functional  
6 outcomes at 90 days compared to thrombectomy<sup>14</sup>.

7 Our study showed that the recanalization rate after EVT did not differ between  
8 perioperative and community-onset AIS stroke patients, which corroborates previous studies  
9 on stroke patients after both cardiovascular and non-cardiovascular surgeries<sup>10 24</sup>.  
10 Importantly, the time from symptom onset to groin puncture in our study is shorter in  
11 perioperative stroke patients than in community-onset AIS stroke patients (median time, 239  
12 vs. 433 minutes). The symptom onset-to-groin puncture time is strongly associated with  
13 better clinical outcome, e.g., functional independence at discharge<sup>25</sup>. We found that the  
14 reduction in NIHSS scores within 24 hours of EVT was significantly greater in perioperative  
15 AIS patients than in community-onset AIS patients, although this difference disappeared  
16 when patients were discharged from our hospital. We observed that: 1) the increase in white  
17 blood cell count was negatively associated with NIHSS score reduction after EVT; and 2)  
18 monocyte counts and C-reactive protein amount were higher in perioperative patients than in  
19 community-onset AIS patients. It therefore stands to reason that inflammatory activation  
20 impedes functional recovery in perioperative AIS patients. It has been reported that the  
21 increase in C-reactive protein<sup>26</sup>, or the inflammatory index C-reaction protein ×  
22 neutrophil/lymphocyte count<sup>27</sup> predicts an unfavorable functional outcome in AIS patients 90  
23 day after EVT.

24 Our study also showed that EVT provided perioperative and community-onset AIS  
25 patients with comparable functional recovery and mortality 3 months after EVT, which is

## Endovascular thrombectomy and perioperative stroke

1 different from a previous observation that perioperative AIS patients had a higher rate of  
2 death within 3 months of EVT than community-onset AIS patients<sup>10</sup>. Not surprisingly, the  
3 underlying diseases requiring surgeries and comorbidities influence the outcome of  
4 perioperative AIS patients after EVT. In the previous study<sup>10</sup>, there were 68% perioperative  
5 AIS patients receiving cardiovascular surgery and 12% receiving neurosurgery, while we had  
6 only 29% patients in the perioperative AIS group, who had undergone cardiovascular  
7 procedure. In studies of the therapeutic efficacy of EVT in in-hospital and community-onset  
8 AIS patients, the former generally had poorer recovery and higher mortality, which was  
9 correlated with the modified Charlson Comorbidity Index (mCCI), incorporating 7  
10 comorbidities, age, diabetes, anemia, active cancer, myocardial infarction, congestive heart  
11 disease, and ulcer disease into the model<sup>11 28</sup>. We further suppose that the widely used mini-  
12 invasive surgery in our studying cohort may favor the functional recovery of perioperative  
13 AIS patients. Compared to open surgical procedures such as sternotomy or open thoracotomy,  
14 minimally invasive techniques offer advantages to patients, such as a lower risk of surgical  
15 and postoperative complications, shorter recovery times and a reduction in postoperative  
16 pain, which can reduce systemic inflammation and hemodynamic changes<sup>29</sup>.

17 Consistent with previous studies<sup>10 11 24 28</sup>, EVT did not lead to an increase in total  
18 intracranial hemorrhage in perioperative AIS patients compared to community-onset AIS  
19 patients. However, when hemorrhages with different subtypes according to the Heidelberg  
20 hemorrhage classification were considered, there were significantly more perioperative AIS  
21 patients with HI1 and PH1 type hemorrhages and subarachnoid hemorrhage than community-  
22 onset AIS patients. Nevertheless, these types of intracranial hemorrhage were generally  
23 thought to have little impact on patient outcome. There were no perioperative AIS patients  
24 with PH2-type hemorrhage and intravascular hemorrhage, which often lead to symptomatic  
25 intracranial hemorrhage and poorer prognosis<sup>16 30</sup>.

## Endovascular thrombectomy and perioperative stroke

1            Obviously, our study has a limitation. The study population was recruited from a  
2 single institution with a limited number of patients. The patients cannot be further subdivided  
3 to evaluate the therapeutic efficacy and safety of EVT in perioperative AIS patients with  
4 cardiovascular or non-cardiovascular procedures. The incidence of PH2-type intracranial  
5 hemorrhage and intravascular hemorrhage in perioperative AIS patients after EVT also  
6 remains unclear.

7

### 8 **Conclusion**

9            Our study shows that endovascular thrombectomy or balloon angioplasty is an  
10 effective and safe therapeutic method for the treatment of perioperative strokes with large  
11 vessel occlusions. It is helpful for clinicians to make treatment decisions for perioperative  
12 stroke patients. Our study also supports the hypothesis that atrial fibrillation and intracranial  
13 cerebral artery stenosis contribute to the occurrence of perioperative stroke. However, our  
14 results need to be validated by further studies with larger populations.

15

16

## Endovascular thrombectomy and perioperative stroke

### 1 **Acknowledgments**

2 The authors thank all patients for contributing to this study.

3

### 4 **Funding**

5 This work was supported by grants from Zhejiang Provincial Basic and Public Welfare  
6 Research Program (No. GF21H020023); Zhejiang Provincial Medicine and Health Research  
7 Foundation (grant number: 2021RC141).

8

### 9 **Data availability statement**

10 The data that support the findings of this study are available on request from the  
11 corresponding author, Y.L. and S.K. The data are not publicly available because it contains  
12 information that could compromise the privacy of the research participants.

13

### 14 **Contributions**

15 Study idea and design: Feng Wang, Yang Liu and Shaofa Ke; Coordination and organization:  
16 Feng Wang and Shaofa Ke; Participants enrollment: En Wang; Data collection and statistical  
17 analysis: Xiaoping Xu, Ling Zheng, and Yang Liu; Writing, editing and revision: Feng Wang  
18 and Yang Liu.

19

### 20 **Ethics declarations**

### 21 **Conflict of interest**

22 The author(s) declared no potential conflicts of interest with respect to the research,  
23 authorship, and/or publication of this article.

24

### 25 **Ethical standards**

26 The studies involving human participants were reviewed and approved by the Ethics  
27 Committee of Taizhou Hospital, Zhejiang Province, China (K20181204).

28

## Endovascular thrombectomy and perioperative stroke

### 1 References

- 2 1. Benesch C, Glance LG, Derdeyn CP, et al. Perioperative Neurological Evaluation and  
3 Management to Lower the Risk of Acute Stroke in Patients Undergoing Noncardiac,  
4 Nonneurological Surgery: A Scientific Statement From the American Heart  
5 Association/American Stroke Association. *Circulation* 2021;143(19):e923-e46. doi:  
6 10.1161/CIR.0000000000000968
- 7 2. Mashour GA, Moore LE, Lele AV, et al. Perioperative care of patients at high risk for  
8 stroke during or after non-cardiac, non-neurologic surgery: consensus statement from  
9 the Society for Neuroscience in Anesthesiology and Critical Care\*. *J Neurosurg*  
10 *Anesthesiol* 2014;26(4):273-85. doi: 10.1097/ANA.0000000000000087
- 11 3. Mashour GA, Shanks AM, Kheterpal S. Perioperative stroke and associated mortality after  
12 noncardiac, nonneurologic surgery. *Anesthesiology* 2011;114(6):1289-96. doi:  
13 10.1097/ALN.0b013e318216e7f4
- 14 4. Vasivej T, Sathirapanya P, Kongkamol C. Incidence and Risk Factors of Perioperative  
15 Stroke in Noncardiac, and Nonaortic and Its Major Branches Surgery. *J Stroke*  
16 *Cerebrovasc Dis* 2016;25(5):1172-76. doi:  
17 10.1016/j.jstrokecerebrovasdis.2016.01.051
- 18 5. Bateman BT, Schumacher HC, Wang S, et al. Perioperative acute ischemic stroke in  
19 noncardiac and nonvascular surgery: incidence, risk factors, and outcomes.  
20 *Anesthesiology* 2009;110(2):231-8. doi: 10.1097/ALN.0b013e318194b5ff
- 21 6. Selim M. Perioperative stroke. *N Engl J Med* 2007;356(7):706-13. doi:  
22 10.1056/NEJMra062668
- 23 7. Kim JS, Kim YJ, Ahn SH, et al. Location of cerebral atherosclerosis: Why is there a  
24 difference between East and West? *Int J Stroke* 2018;13(1):35-46. doi:  
25 10.1177/1747493016647736
- 26 8. Maingard J, Foo M, Chandra RV, et al. Endovascular Treatment of Acute Ischemic Stroke.  
27 *Curr Treat Options Cardiovasc Med* 2019;21(12):89. doi: 10.1007/s11936-019-0781-  
28 9 [published Online First: 20191211]
- 29 9. Shah S, Hatfield J, Fuller M, et al. Mechanical thrombectomy for perioperative ischemic  
30 stroke following elective inpatient surgery in the United States. *J Clin Neurosci*  
31 2022;101:100-05. doi: 10.1016/j.jocn.2022.05.009
- 32 10. Premat K, Clovet O, Frasca Polara G, et al. Mechanical Thrombectomy in Perioperative  
33 Strokes: A Case-Control Study. *Stroke* 2017;48(11):3149-51. doi:  
34 10.1161/STROKEAHA.117.018033
- 35 11. Monch S, Lehm M, Maegerlein C, et al. Worse endovascular mechanical recanalization  
36 results for patients with in-hospital onset acute ischemic stroke. *J Neurol*  
37 2018;265(11):2525-30. doi: 10.1007/s00415-018-9035-0
- 38 12. Powers WJ, Rabinstein AA, Ackerson T, et al. Guidelines for the Early Management of  
39 Patients With Acute Ischemic Stroke: 2019 Update to the 2018 Guidelines for the  
40 Early Management of Acute Ischemic Stroke: A Guideline for Healthcare  
41 Professionals From the American Heart Association/American Stroke Association.  
42 *Stroke* 2019;50(12):e344-e418. doi: 10.1161/STR.0000000000000211 [published  
43 Online First: 20191030]
- 44 13. Liu L, Chen W, Zhou H, et al. Chinese Stroke Association guidelines for clinical  
45 management of cerebrovascular disorders: executive summary and 2019 update of  
46 clinical management of ischaemic cerebrovascular diseases. *Stroke Vasc Neurol*  
47 2020;5(2):159-76. doi: 10.1136/svn-2020-000378 [published Online First: 20200618]



## Endovascular thrombectomy and perioperative stroke

- 1 14. Zhang L, He X, Li K, et al. Balloon angioplasty as first-choice recanalization strategy for  
2 intracranial atherosclerosis-related emergent large vessel occlusion with small clot  
3 burden. *Neuroradiology* 2024;66(3):399-407. doi: 10.1007/s00234-023-03278-8
- 4 15. Higashida RT, Furlan AJ, Roberts H, et al. Trial design and reporting standards for intra-  
5 arterial cerebral thrombolysis for acute ischemic stroke. *Stroke* 2003;34(8):e109-37.  
6 doi: 10.1161/01.STR.0000082721.62796.09
- 7 16. von Kummer R, Broderick JP, Campbell BC, et al. The Heidelberg Bleeding  
8 Classification: Classification of Bleeding Events After Ischemic Stroke and  
9 Reperfusion Therapy. *Stroke* 2015;46(10):2981-6. doi:  
10 10.1161/STROKEAHA.115.010049
- 11 17. Adams HP, Jr., Bendixen BH, Kappelle LJ, et al. Classification of subtype of acute  
12 ischemic stroke. Definitions for use in a multicenter clinical trial. TOAST. Trial of  
13 Org 10172 in Acute Stroke Treatment. *Stroke* 1993;24(1):35-41. doi:  
14 10.1161/01.str.24.1.35
- 15 18. Barber PA, Demchuk AM, Zhang J, et al. Validity and reliability of a quantitative  
16 computed tomography score in predicting outcome of hyperacute stroke before  
17 thrombolytic therapy. ASPECTS Study Group. Alberta Stroke Programme Early CT  
18 Score. *Lancet* 2000;355(9216):1670-4. doi: 10.1016/s0140-6736(00)02237-6
- 19 19. Puetz V, Sylaja PN, Coutts SB, et al. Extent of hypoattenuation on CT angiography source  
20 images predicts functional outcome in patients with basilar artery occlusion. *Stroke*  
21 2008;39(9):2485-90. doi: 10.1161/STROKEAHA.107.511162
- 22 20. Yi TY, Chen WH, Wu YM, et al. Microcatheter "First-Pass Effect" Predicts Acute  
23 Intracranial Artery Atherosclerotic Disease-Related Occlusion. *Neurosurgery*  
24 2019;84(6):1296-305. doi: 10.1093/neuros/nyy183
- 25 21. Siontis KC, Gersh BJ, Weston SA, et al. Association of New-Onset Atrial Fibrillation  
26 After Noncardiac Surgery With Subsequent Stroke and Transient Ischemic Attack.  
27 *JAMA* 2020;324(9):871-78. doi: 10.1001/jama.2020.12518
- 28 22. Lin MH, Kamel H, Singer DE, et al. Perioperative/Postoperative Atrial Fibrillation and  
29 Risk of Subsequent Stroke and/or Mortality. *Stroke* 2019;50(6):1364-71. doi:  
30 10.1161/STROKEAHA.118.023921
- 31 23. Tsang ACO, Orru E, Klostranec JM, et al. Thrombectomy Outcomes of Intracranial  
32 Atherosclerosis-Related Occlusions. *Stroke* 2019;50(6):1460-66. doi:  
33 10.1161/STROKEAHA.119.024889
- 34 24. Bay B, Gloyer NO, Rimmel M, et al. Mechanical thrombectomy in ischemic stroke after  
35 cardiovascular procedures: a propensity-matched cohort analysis. *J Neurointerv Surg*  
36 2023;15(e1):e129-e35. doi: 10.1136/jnis-2022-019152
- 37 25. Jahan R, Saver JL, Schwamm LH, et al. Association Between Time to Treatment With  
38 Endovascular Reperfusion Therapy and Outcomes in Patients With Acute Ischemic  
39 Stroke Treated in Clinical Practice. *JAMA* 2019;322(3):252-63. doi:  
40 10.1001/jama.2019.8286
- 41 26. Finck T, Sperl P, Hernandez-Petzsche M, et al. Inflammation in stroke: initial CRP levels  
42 can predict poor outcomes in endovascularly treated stroke patients. *Front Neurol*  
43 2023;14:1167549. doi: 10.3389/fneur.2023.1167549
- 44 27. Du M, Xu L, Zhang X, et al. Association Between Inflammatory Burden Index and  
45 Unfavorable Prognosis After Endovascular Thrombectomy in Acute Ischemic Stroke.  
46 *J Inflamm Res* 2023;16:3009-17. doi: 10.2147/JIR.S419087
- 47 28. Jung JW, Kim KH, Yun J, et al. Effectiveness of endovascular treatment for in-hospital  
48 stroke vs. community-onset stroke: a propensity score-matched analysis. *Journal of*  
49 *Neurology* 2024 doi: 10.1007/s00415-024-12232-4

## Endovascular thrombectomy and perioperative stroke

- 1 29. Mohiuddin K, Swanson SJ. Maximizing the benefit of minimally invasive surgery. *J Surg*  
2 *Oncol* 2013;108(5):315-9. doi: 10.1002/jso.23398  
3 30. Hall E, Ullberg T, Andsberg G, et al. Incidence of intracranial hemorrhagic complications  
4 after anterior circulation endovascular thrombectomy in relation to occlusion site: a  
5 nationwide observational register study. *J Neurointerv Surg* 2023 doi: 10.1136/jnis-  
6 2023-020768  
7

8 Table 1, Characteristics of the patients

| Variables                                                | Total<br>(n = 619) | Perioperative<br>stroke<br>(n = 35) | Community-<br>onset stroke<br>(n = 584) | P-value |
|----------------------------------------------------------|--------------------|-------------------------------------|-----------------------------------------|---------|
| <b>Demographic characteristics</b>                       |                    |                                     |                                         |         |
| Female, n (%)                                            | 237 (38.3)         | 14 (40.0)                           | 223 (38.2)                              | 0.830   |
| Age, mean ± SD, years                                    | 68.87 ± 12.07      | 65.83 ± 12.21                       | 69.05 ± 12.05                           | 0.125   |
| <b>Risk factors for stroke</b>                           |                    |                                     |                                         |         |
| Atrial fibrillation, n (%)                               | 171 (27.6)         | 15 (42.9)                           | 156 (26.7)                              | 0.038   |
| Hypertension, n (%)                                      | 367 (59.3)         | 21 (60.0)                           | 346 (59.2)                              | 0.930   |
| Diabetes, n (%)                                          | 113 (18.3)         | 6 (17.1)                            | 107 (18.3)                              | 0.861   |
| Coronary heart disease, n (%)                            | 35 (5.7)           | 2 (5.7)                             | 33 (5.7)                                | 0.987   |
| Previous stroke, n (%)                                   | 124 (20.0)         | 5 (14.3)                            | 119 (20.4)                              | 0.382   |
| Smoking, n (%)                                           | 186 (30.0)         | 7 (20.0)                            | 179 (30.7)                              | 0.182   |
| <b>Laboratory findings</b>                               |                    |                                     |                                         |         |
| White blood cells, median (P25, P75), 10 <sup>9</sup> /L | 9.3 (7.5, 11.5)    | 10 (8.4, 12.9)                      | 9.3 (7.4, 11.3)                         | 0.119   |
| Monocytes, median (P25, P75), 10 <sup>9</sup> /L         | 0.4 (0.3, 0.6)     | 0.6 (0.4, 0.7)                      | 0.4 (0.3, 0.6)                          | 0.002   |
| Neutrophils, median (P25, P75), 10 <sup>9</sup> /L       | 7.7 (5.8, 9.8)     | 8.3 (6, 11.5)                       | 7.6 (5.8, 9.7)                          | 0.110   |
| Lymphocytes, median (P25, P75), 10 <sup>9</sup> /L       | 1 (0.7, 1.4)       | 1.1 (0.8, 1.4)                      | 1 (0.7, 1.4)                            | 0.404   |
| Platelets, median (P25, P75), 10 <sup>9</sup> /L         | 191 (152, 227)     | 188 (147, 241)                      | 191 (152, 226)                          | 0.927   |
| C-reactive protein, median (P25, P75), mg/L              | 6.8 (2.9, 18.7)    | 15.4 (4.9, 54.4)                    | 6.4 (2.7, 17.4)                         | < 0.001 |
| Fibrinogen, median (P25, P75), g/L                       | 3.1 (2.6, 3.7)     | 3.7 (3.1, 4.8)                      | 3.1 (2.6, 3.7)                          | < 0.001 |
| D-dimer, median (P25, P75), mg/L                         | 1.3 (0.7, 2.5)     | 1.5 (0.6, 2.3)                      | 1.3 (0.7, 2.5)                          | 0.594   |
| Cr, median (P25, P75), µmol/L                            | 66 (54, 81)        | 63 (50, 86)                         | 66 (55, 80)                             | 0.506   |
| BUN, median (P25, P75), mmol/L                           | 5.0 (3.9, 6.4)     | 5.5 (4.8, 6.7)                      | 5.0 (3.9, 6.3)                          | 0.069   |
| Glucose, median (P25, P75), mmol/L                       | 6.7 (5.6, 8.4)     | 6.6 (5.6, 8.5)                      | 6.7 (5.5, 8.4)                          | 0.938   |
| TG, median (P25, P75), mmol/L                            | 1.0 (0.7, 1.5)     | 1.1 (0.7, 1.8)                      | 1.0 (0.7, 1.5)                          | 0.911   |
| TC, median (P25, P75), mmol/L                            | 4.0 (3.4, 4.7)     | 4.1 (3.1, 4.7)                      | 4.0 (3.4, 4.7)                          | 0.806   |
| HDL, median (P25, P75), mmol/L                           | 1.2 (1.0, 1.4)     | 1.1 (1.0, 1.4)                      | 1.2 (1.0, 1.4)                          | 0.913   |
| LDL, median (P25, P75), mmol/L                           | 2.2 (1.7, 2.7)     | 2.2 (1.5, 2.6)                      | 2.2 (1.7, 2.7)                          | 0.642   |
| Hemoglobin, median (P25, P75), g/L                       | 126 (114, 136)     | 126 (114, 133)                      | 126 (114, 136)                          | 0.637   |
| <b>Clinical findings</b>                                 |                    |                                     |                                         |         |
| NIHSS at admission, median (P25, P75)                    | 15 (11, 19)        | 16 (11, 20)                         | 15 (11, 19)                             | 0.581   |
| Systolic blood pressure, mean ± SD, mmHg                 | 151 ± 25           | 132 ± 21                            | 152 ± 24                                | < 0.001 |
| Diastolic blood pressure, median (P25, P75), mmHg        | 87 (76, 98)        | 79 (70, 84)                         | 87 (77, 99)                             | < 0.001 |
| <b>TOAST classification</b>                              |                    |                                     |                                         |         |
| Cardioembolism                                           | 254 (41.0)         | 14 (40.0)                           | 240 (41.1)                              | 0.056   |
| Large-artery atherosclerosis                             | 341 (55.1)         | 17 (48.6)                           | 324 (55.5)                              |         |
| Stroke of undetermined or other determined etiology      | 24 (3.9)           | 4 (11.4)                            | 20 (3.4)                                |         |
| <b>Postoperative medication</b>                          |                    |                                     |                                         |         |
|                                                          |                    |                                     |                                         | < 0.001 |

## Endovascular thrombectomy and perioperative stroke

|                                                |            |           |            |
|------------------------------------------------|------------|-----------|------------|
| No antiplatelet and anticoagulant drugs, n (%) | 72 (11.6)  | 2 (5.7)   | 70 (12.0)  |
| Antiplatelet drugs, n (%)                      | 512 (82.7) | 24 (68.6) | 488 (83.6) |
| Anticoagulant drugs, n (%)                     | 8 (1.3)    | 5 (14.3)  | 3 (0.5)    |
| Antiplatelet and anticoagulant drugs, n (%)    | 27 (4.4)   | 4 (11.4)  | 23 (3.9)   |

---

1  
2 Note: Continuous variables with normal distribution were expressed as mean  $\pm$  SD and non-normally distributed data were  
3 expressed as median (IQR). Categorical variables were presented as frequencies. Cr, serum creatinine; BUN, blood urea  
4 nitrogen; TG, triglyceride; TC, total cholesterol; HDL, high density lipoprotein; LDL, low density lipoprotein; NIHSS,  
5 National Institute of Health stroke scale. Continuous variables were compared between independent groups by *T*-test or  
6 Mann-Whitney *U* test depending on whether the continuous variables were normally distributed. Categorical variables were  
7 compared by Pearson  $\chi^2$  test.

8  
9

## Endovascular thrombectomy and perioperative stroke

1 Table 2, Characteristics of endovascular therapy procedure

| Variables                                                                      | Total<br>(n = 619) | Perioperative<br>stroke<br>(n = 35) | Community-<br>onset stroke<br>(n = 584) | P-value |
|--------------------------------------------------------------------------------|--------------------|-------------------------------------|-----------------------------------------|---------|
| <b>ASPECT score</b> , median (P25, P75)                                        | 9 (8, 10)          | 10 (10, 10)                         | 9 (8, 10)                               | < 0.001 |
| <b>Fibrinolysis</b>                                                            | 189 (30.5)         | 2 (5.7)                             | 187 (32.0)                              | 0.001   |
| <b>Endovascular therapy</b>                                                    |                    |                                     |                                         |         |
| Onset-to-puncture time, median (P25, P75), minutes                             | 420 (300, 655)     | 239 (178, 299)                      | 433 (315, 666)                          | < 0.001 |
| Puncture-to-recanalization time, median (P25, P75), minutes                    | 66 (45, 100)       | 60 (38, 90)                         | 66 (45, 102)                            | 0.129   |
| Successful reperfusion (mTICI $\geq$ 2b grade)                                 | 602 (97.3)         | 34 (97.1)                           | 568 (97.3)                              | 0.967   |
| Numbers of passes of catheter, median (P25, P75)                               | 1 (1, 2)           | 1 (1, 2)                            | 1 (1, 2)                                | 0.151   |
| <b>Location of occluded artery</b>                                             |                    |                                     |                                         |         |
| Terminus internal carotid artery, n (%)                                        | 114 (18.4)         | 10 (28.6)                           | 104 (17.8)                              | 0.222   |
| Middle cerebral artery, n (%)                                                  | 316 (51.1)         | 20 (57.1)                           | 296 (50.7)                              |         |
| Anterior cerebral artery, n (%)                                                | 16 (2.6)           | 1 (2.9)                             | 15 (2.6)                                |         |
| $\geq$ 2 arteries in anterior circulation, n (%)                               | 58 (9.4)           | 0 (0)                               | 58 (9.9)                                |         |
| Basilar artery, n (%)                                                          | 80 (12.9)          | 3 (8.6)                             | 77 (13.2)                               |         |
| Vertebral artery, n (%)                                                        | 25 (4.0)           | 0 (0)                               | 25 (4.3)                                |         |
| Posterior cerebral artery, n (%)                                               | 10 (1.6)           | 1 (2.9)                             | 9 (1.5)                                 |         |
| <b>Endovascular therapy procedure</b>                                          |                    |                                     |                                         |         |
| Stent retriever, n (%)                                                         | 423 (68.3)         | 24 (68.6)                           | 399 (68.3)                              | < 0.001 |
| Balloon angioplasty, n (%)                                                     | 28 (4.5)           | 6 (17.1)                            | 22 (3.8)                                |         |
| Stent retriever and balloon angioplasty, n (%)                                 | 127 (20.5)         | 1 (2.9)                             | 126 (21.6)                              |         |
| Aspiration catheter, n (%)                                                     | 17 (2.7)           | 3 (8.6)                             | 14 (2.4)                                |         |
| Aspiration catheter or stent retriever, n (%)                                  | 24 (3.9)           | 1 (2.9)                             | 23 (3.9)                                |         |
| <b>Clinical findings</b>                                                       |                    |                                     |                                         |         |
| NIHSS at 24 hours after EVT, median (P25, P75)                                 | 13 (7, 19)         | 8 (5, 18)                           | 13 (7, 19)                              | 0.094   |
| Reduction of NIHSS at 24 hours compared to NIHSS before EVT, median (P25, P75) | 0 (0, 5)           | 5 (0, 10)                           | 0 (0, 4)                                | < 0.001 |
| NIHSS at 7 days after EVT, median (P25, P75)                                   | 7 (2, 15)          | 3 (1, 14)                           | 7 (2, 15)                               | 0.204   |
| mRS $\leq$ 2 at 90 days after EVT, n (%)                                       | 271 (43.8)         | 18 (51.4)                           | 253 (43.3)                              | 0.348   |
| Mortality at the end of study, n (%)                                           | 108 (17.4)         | 4 (11.4)                            | 104 (17.8)                              | 0.933   |

2  
3 Note: Non-normally distributed data were expressed as median (IQR). Categorical variables were presented as frequencies.  
4 Continuous variables were compared between independent groups by Mann-Whitney *U* test. Categorical variables were  
5 compared by Pearson  $\chi^2$  test.  
6  
7

## Endovascular thrombectomy and perioperative stroke

1 Table 3, Characteristics of intracranial hemorrhage

| Variables                                                                              | Total<br>(n = 619) | Peri-operative<br>stroke<br>(n = 35) | Community-<br>onset stroke<br>(n = 584) | $\chi^2$ test<br>P-value |
|----------------------------------------------------------------------------------------|--------------------|--------------------------------------|-----------------------------------------|--------------------------|
| <b>Intracranial hemorrhages</b>                                                        | 123 (19.9)         | 9 (25.7)                             | 114 (19.5)                              | 0.372                    |
| <b>The Heidelberg Bleeding Classification</b>                                          |                    |                                      |                                         | 0.004                    |
| 0. No hemorrhages                                                                      | 496 (80.1)         | 26 (74.3)                            | 470 (80.5)                              |                          |
| 1. Hemorrhagic transformation of infarcted brain tissue                                |                    |                                      |                                         |                          |
| 1a (HI1), Scattered small petechiae, no mass effect                                    | 26 (4.2)           | 4 (11.4)                             | 22 (3.8)                                |                          |
| 1b (HI2), Confluent petechiae, no mass effect                                          | 54 (8.7)           | 0 (0)                                | 52 (8.9)                                |                          |
| 1c (PH1), Hematoma within infarcted tissue, occupying <30%, no substantive mass effect | 16 (2.6)           | 3 (8.6)                              | 14 (2.4)                                |                          |
| 2. Intracerebral hemorrhage within and beyond infarcted brain tissue                   |                    |                                      |                                         |                          |
| PH2, Hematoma occupying 30% or more of the infarcted tissue, with obvious mass effect  | 14 (2.3)           | 0 (0)                                | 15 (2.6)                                |                          |
| 3. Intracerebral hemorrhage outside the infarcted brain tissue                         |                    |                                      |                                         |                          |
| 3a Parenchymal hematoma remote from infarcted brain tissue                             | 13 (2.1)           | 0 (0)                                | 1 (0.2)                                 |                          |
| 3b Intraventricular hemorrhage                                                         |                    | 0 (0)                                | 6 (1.0)                                 |                          |
| 3c Subarachnoid hemorrhage                                                             |                    | 2 (5.7)                              | 5 (0.9)                                 |                          |

2  
3

## Endovascular thrombectomy and perioperative stroke

### 1 **Figure legends**

2 **Figure 1. Endovascular thrombectomy achieves comparable functional recovery in**  
3 **perioperative and community-onset stroke patients.** Functional recovery of patients with  
4 acute ischemic stroke was assessed using the modified Rankin Scale (mRS) at 90 days after  
5 endovascular thrombectomy. The mRS scores range from 0 to 6, with score 0 indicating no  
6 symptoms, to score 5 indicating severe disability and score 6 indicating death. The  
7 distribution of patients with different mRS scores did not differ between the perioperative and  
8 community-onset stroke patient groups.  $\chi^2$  test, n = 35 and 584 for perioperative and  
9 community-onset stroke groups, respectively.

10

11

### Modified Rankin Scale score

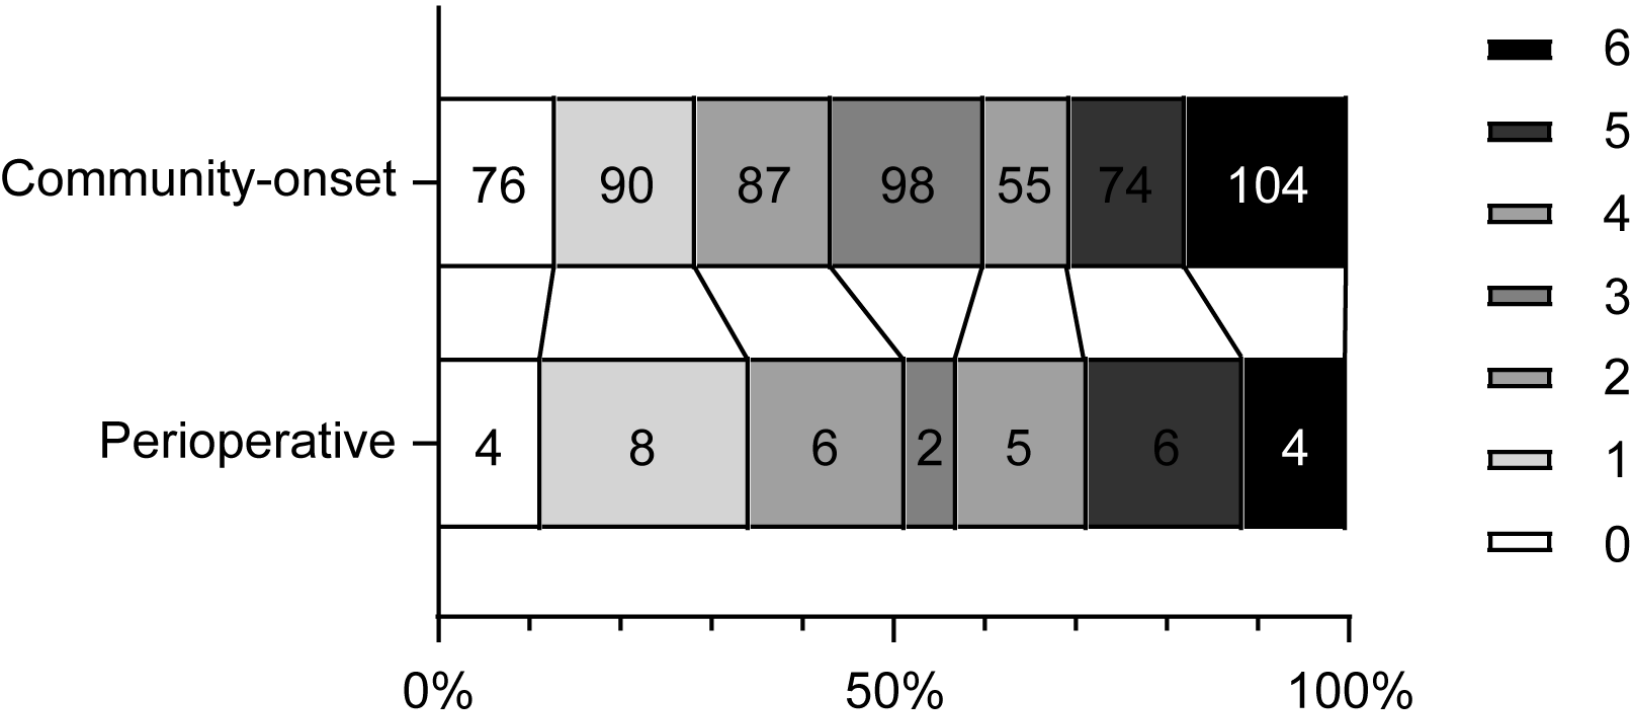

(Pearson  $\chi^2$  test,  $P=0.432$ )
